# Supplementary material for: An Asymptomatic Patient with Fatal Infertility Carried a Swedish Strain of Chlamydia trachomatis with Additional Deletion in The Plasmid orf1 that Belonged to A Different MLST Sequence Type
Source: PubMed Central journal article supplement (PMC6681046; doi:10.3390/microorganisms7070187), 2019-06-28
Supplement: microorganisms-07-00187-s001.pdf [file microorganisms-07-00187-s001.pdf]

## Supplemental Information

**Table 1.** The main sperm characteristics of the case-patient, Saratov city, 2012.

| <b>Sperm indicator</b>                  | <b>Case-patient</b> | <b>WHO reference limit [1]</b> |
|-----------------------------------------|---------------------|--------------------------------|
| Concentration of spermatozoa            |                     |                                |
| progressive                             | 20%                 | >32%                           |
| non-progressive                         | 27%                 |                                |
| immotile                                | 53%                 | >50%                           |
| vitality                                | 35%                 | >58%                           |
| Total volume                            | 3 ml                | ≥ 1,5 ml                       |
| pH                                      | 7.8                 | ≥7,2                           |
| Sperm concentration, spermatozoa per ml | $12 \times 10^6$    | $15 \times 10^6$               |
